# Supplementary material
Source: publisher figshare collection journal article supplement (https://karger.figshare.com/ndownloader/files/13095200)
Supplement: Supplementary file 1 [file 13095200]

****Online Suppl. Table 1.** Rapid PAP stain protocol**

| **SOLUTION** | **TIME** |
| --- | --- |
| Tap water  Gill hematoxyline  Rinse –tap water  Scott water  Tap water (2x)  Ethanol. 95  EA modified  Ethanol 95  Ethanol 100  Xylol | 2 baths 10 sec  1 min  2 baths 10 sec  1 min  2 baths 10 sec  2 baths 10 sec  1 min  2 baths 20 sec  2 baths 20 sec  3 baths 40 sec |
